# Supplementary material for: Identification of the Adapter Molecule MTSS1 as a Potential Oncogene-Specific Tumor Suppressor in Acute Myeloid Leukemia
Source: PubMed Central journal article supplement (PMC4440712; doi:10.1371/journal.pone.0125783), 2015-05-21
Supplement: pone.0125783.s001.pdf [file pone.0125783.s001.pdf]

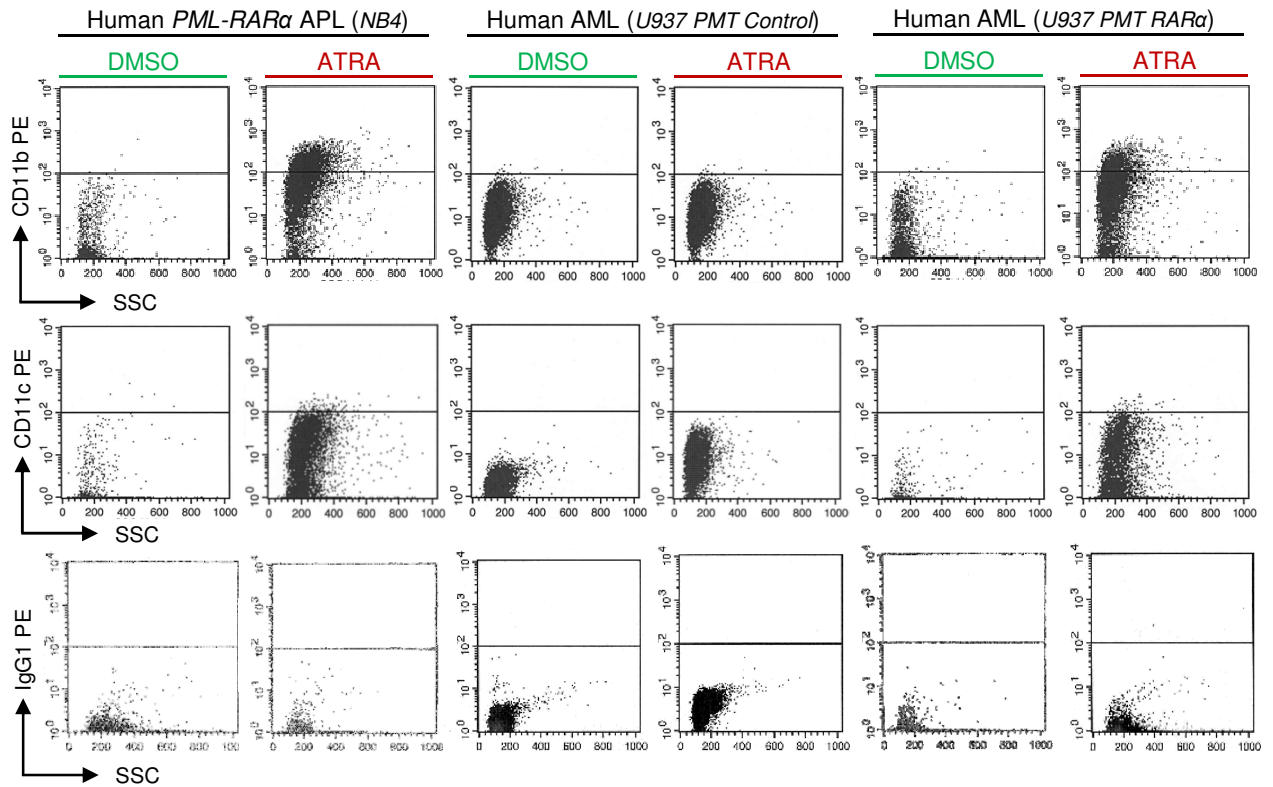

**Supporting Information S1. ATRA induces maturation and differentiation in NB4 and PML9 transduced U937 cells.** Human AML cell lines (NB4, U937 or U937 transduced with PMT *RARα*) were treated with either DMSO control or ATRA to induce myeloid differentiation and maturation as assessed by FACS analysis (n=3).
