# Supplementary material for: Identification of the Adapter Molecule MTSS1 as a Potential Oncogene-Specific Tumor Suppressor in Acute Myeloid Leukemia
Source: PubMed Central journal article supplement (PMC4440712; doi:10.1371/journal.pone.0125783), 2015-05-21
Supplement: pone.0125783.s002.pdf [file pone.0125783.s002.pdf]

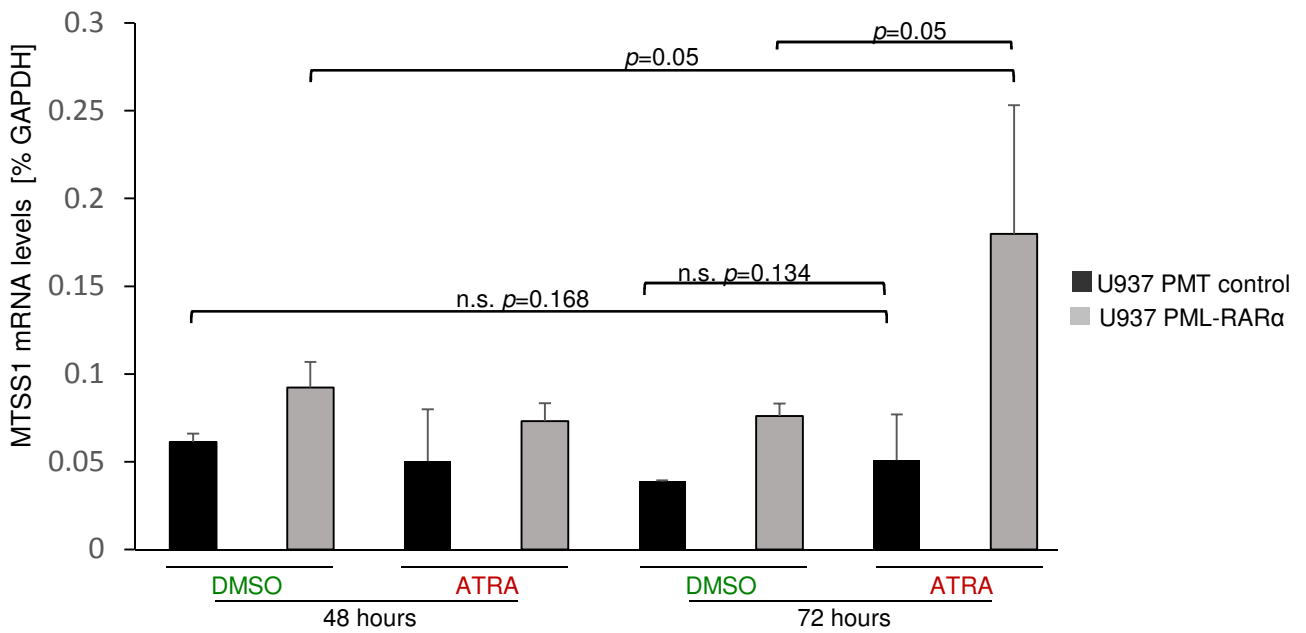

**Supporting Information S3. Effekt of ATRA treatment on Mtss1 expression in PML-RAR $\alpha$  positive cells.** PML-RAR $\alpha$  positive U937 and empty vector control U937 cells (U937 PMT control) were treated using ATRA or DMSO as vehicle control and MTSS1 mRNA levels were assessed by qRT-PCR at indicated time points.
