# Supplementary material for: Identification of the Adapter Molecule MTSS1 as a Potential Oncogene-Specific Tumor Suppressor in Acute Myeloid Leukemia
Source: PubMed Central journal article supplement (PMC4440712; doi:10.1371/journal.pone.0125783), 2015-05-21
Supplement: pone.0125783.s003.pdf [file pone.0125783.s003.pdf]

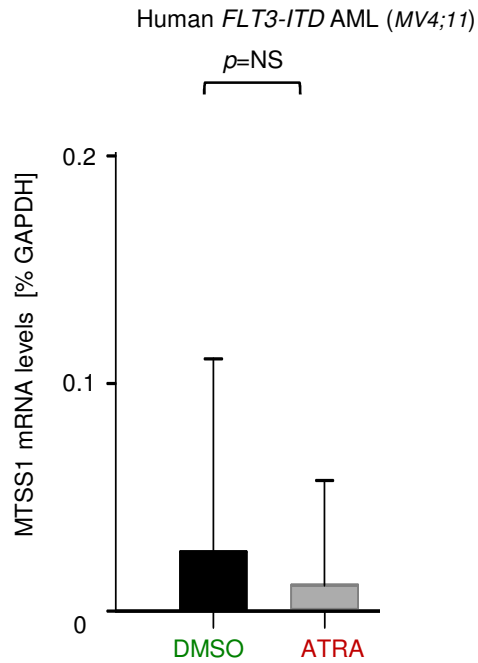

**Supporting Information S2. ATRA treatment does not affect *Mtss1* expression in *FLT3-ITD* positive AML.** Human *FLT3-ITD* AML cell line MV4;11 was treated with ATRA and *MTSS1* mRNA levels were assessed.
